# Supplementary material for: Capturing in situ generated NHCH–NNH molecule via the templating synthesis of a 4-connected open Cd(ii) framework
Source: Royal Society of Chemistry journal article supplement (doi:10.1039/b916206b), 2009-11-05
Supplement: b916206b.pdf [file b916206b.pdf]

## Supporting Information

### Capturing *In Situ* Generated NH=CH-N=NH Molecule *via* the Templating Synthesis of a 4-Connected Open Cd(II) Framework

Jian-Kai Cheng, Jian Zhang, Pei-Xiu Yin, Qi-Pu Lin, Zhao-Ji Li, Ye-Yan Qin, Xin-Yi Cao,  
Yuan-Gen Yao\*

The State Key Laboratory of Structural Chemistry, Fujian Institute of Research on the Structure of Matter, The Chinese Academy of Sciences, Fuzhou, Fujian 350002, P. R. China. E-mail: [yyg@fjirsm.ac.cn](mailto:yyg@fjirsm.ac.cn)

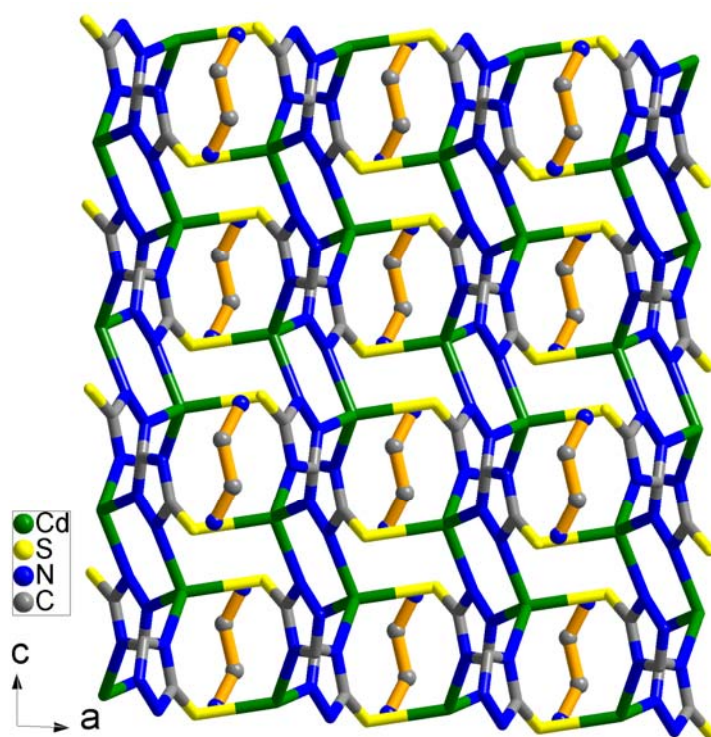

Figure S1 The 3D network of compound 1 along b axis.

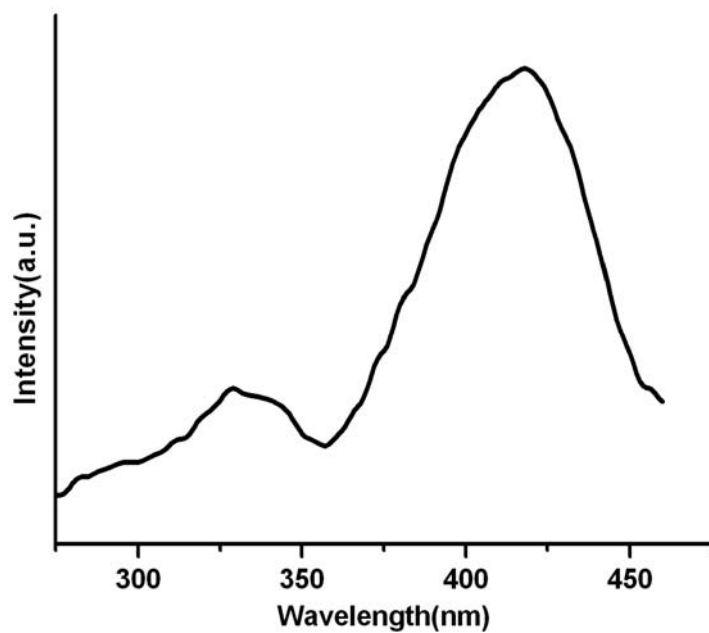

Figure S2 The solid-state excitation spectrum at room temperature.

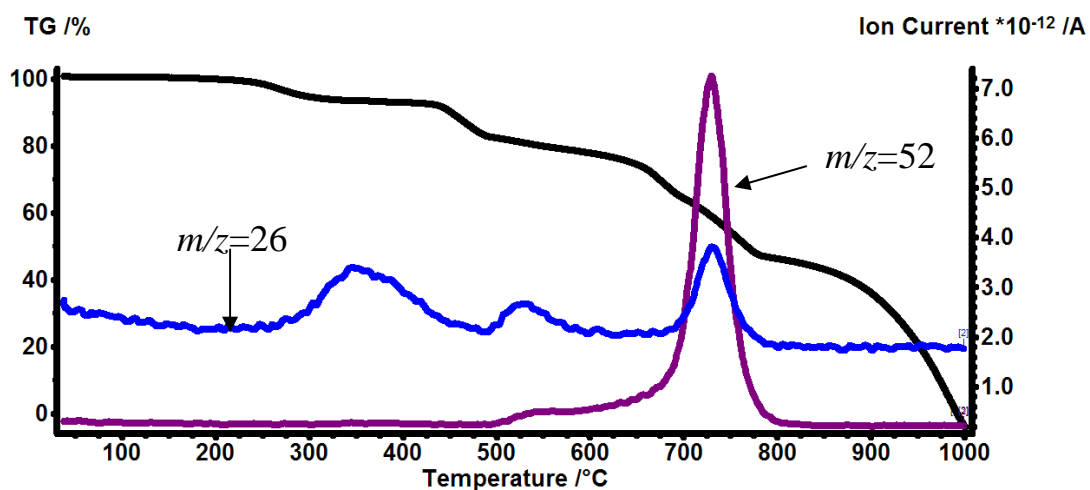

Figure S3 TGA coupled with QMS analysis for 1 with ions current singles respectively for  $m/z=26$  and  $m/z=52$ .

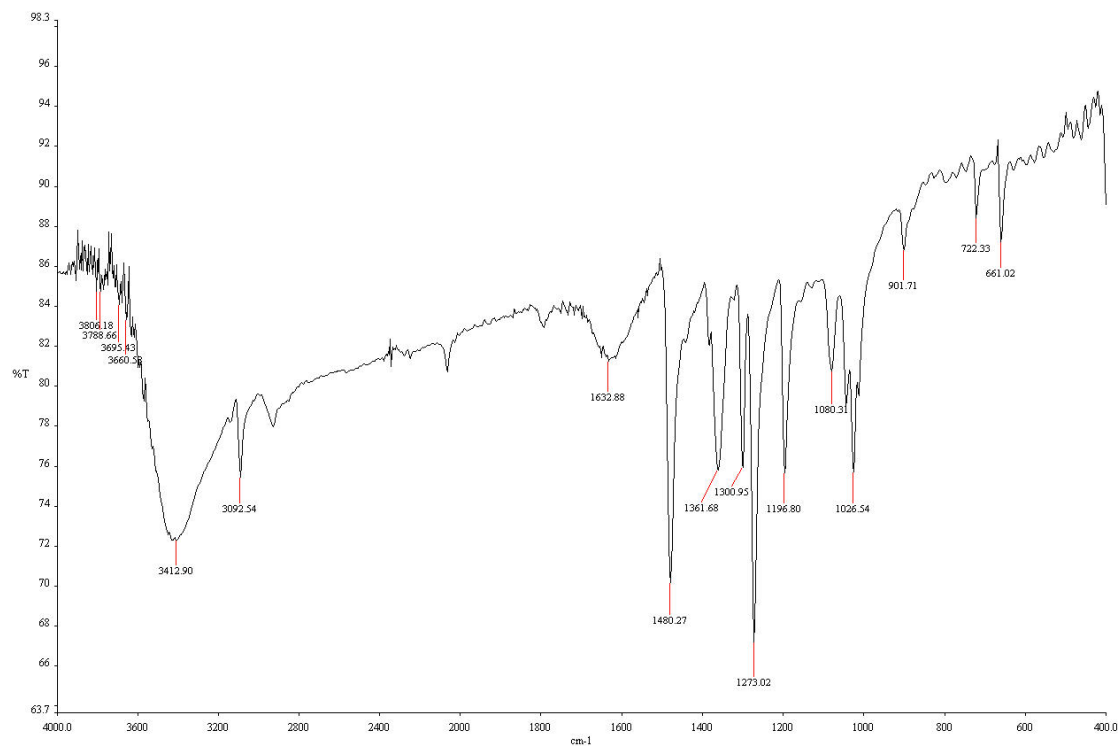

Figure S4 IR spectrum of 1

**Table S1** Elemental analysis data of complex 1

| Compound | C(%)             | H(%)             | N(%)             | S(%)             |
|----------|------------------|------------------|------------------|------------------|
|          | Found<br>(Calc.) | Found<br>(Calc.) | Found<br>(Calc.) | Found<br>(Calc.) |
| 1        | 12.25(12.43)     | 0.98(1.04)       | 26.22(26.10)     | 13.16(13.24)     |
